# Supplementary material
Source: Springer Nature journal article supplement (https://www.springermedizin.de/resource/supplementary/12885_2008_1277_MOESM2_ESM.pdf/9471622)
Supplement: MOESM2 [file 9471622]

Additional file 2

File format: DOC

Title: Selection of Candidate Genes profiled in the training set

Description: We selected 197 candidate genes from the published literature and microarray-based gene expression profiling experiments. The candidate genes included the 70-gene panel described in van't Veer et al, 104 genes further analyzed from Rosetta dataset (Dai et al), the Paik et al reported 16-gene panel (excluded the housekeeping genes from 21-gene panel), and 24 ER related genes. The 197 candidate genes and their accession number are listed below.

| <b>LL_Symbol</b> | <b>Accession Number</b> |
|------------------|-------------------------|
| AARS             | NM_001605               |
| ABCB6            | NM_005689               |
| ACBD4            | NM_024722               |
| ADAM8            | NM_001109               |
| ADM              | NM_001124               |
| AI224578         | CONTIG40831RC           |
| AK026372         | AK026372                |
| AK123483         | CONTIG63649RC           |
| AKAP2            | NM_007203               |
| ALDH4A1          | NM_003748               |
| ALDOC            | NM_005165               |
| AP2B1            | NM_001282               |
| APOBEC3B         | NM_004900               |
| AR               | NM_000044               |
| AURKA            | NM_003600               |
| AYTL2            | NM_024830               |
| BAG1             | NM_004323               |
| BBC3             | NM_014417               |
| BC039414         | BC039414                |
| BCL2             | NM_000633               |
| BIRC5            | NM_001168               |
| BLM              | NM_000057               |
| BTD              | NM_000060               |
| BUB1             | NM_004336               |
| C15orf42         | NM_152259               |
| C16orf61         | NM_020188               |
| C20orf46         | NM_018354               |
| C9orf30          | NM_080655               |
| C9orf46          | NM_018465               |
| CAPZB            | NM_004930               |
| CCNB1            | NM_031966               |
| CCNB2            | NM_004701               |
| CCNE2            | NM_004702               |
| CD68             | NM_001251               |
| CDC42BPA         | NM_003607               |
| CDC6             | NM_001254               |
| CDCA3            | NM_031299               |
| CDCA7            | NM_031942               |
| CENPA            | NM_001809               |
| CENPN            | NM_018455               |
| COL14A1          | NM_021110               |

| <b>LL_Symbol</b> | <b>Accession Number</b> |
|------------------|-------------------------|
| KPNA2            | NM_002266               |
| LAGE3            | NM_006014               |
| LDHA             | NM_005566               |
| LIN9             | NM_173083               |
| LOC124220        | NM_145252               |
| LOC286052        | AK095104                |
| LRRC17           | NM_005824               |
| MAD2L1           | NM_002358               |
| MAPT             | NM_005910               |
| MASTL            | NM_032844               |
| MCM6             | NM_005915               |
| MELK             | NM_014791               |
| MKI67            | NM_002417               |
| MLF1IP           | NM_024629               |
| MMP3             | NM_002422               |
| MMP9             | NM_004994               |
| MS4A7            | NM_021201               |
| MTDH             | NM_178812               |
| MYB              | NM_005371               |
| MYBL2            | NM_002466               |
| MYSM1            | XM_055481               |
| NAT1             | NM_000662               |
| NDC80            | NM_006101               |
| NDRG1            | NM_006096               |
| NME1             | NM_000269               |
| NMU              | NM_006681               |
| NTN4             | NM_021229               |
| NUSAP1           | NM_016359               |
| ORC6L            | NM_014321               |
| OXCT1            | NM_000436               |
| P2RX4            | NM_002560               |
| P4HA1            | NM_000917               |
| PARD6B           | XM_030559               |
| PECI             | NM_006117               |
| PERLD1           | NM_033419               |
| PFKFB4           | NM_004567               |
| PFKP             | NM_002627               |
| PGK1             | NM_000291               |
| PGR              | NM_000926               |
| PHLDA2           | NM_003311               |
| PITRM1           | NM_014889               |

|               |               |
|---------------|---------------|
| COL4A2        | NM_001846     |
| CONTIG46218RC | CONTIG46218RC |
| CSTA          | NM_005213     |
| CTSC          | NM_001814     |
| CTSD          | NM_001909     |
| CTSL2         | NM_001333     |
| CX3CL1        | NM_002996     |
| DCK           | NM_000788     |
| DEPDC1B       | NM_018369     |
| DHX58         | NM_024119     |
| DIAPH3        | NM_030932     |
| DTL           | NM_016448     |
| E2F1          | NM_004168     |
| EBF4          | XM_044921     |
| ECT2          | NM_018098     |
| EGLN1         | NM_022051     |
| EIF3S3        | NM_003756     |
| ENO1          | NM_001428     |
| ERBB2         | NM_004448     |
| ESM1          | NM_007036     |
| ESPL1         | NM_012291     |
| ESR1          | NM_000125     |
| EXOC7         | XM_036173     |
| EXT1          | NM_000127     |
| FADS1         | NM_013402     |
| FBXO31        | NM_024735     |
| FGF18         | NM_003862     |
| FLNA          | NM_001456     |
| FLT1          | NM_002019     |
| FOXA1         | NM_000181     |
| FST           | NM_006350     |
| GAPDH         | NM_002046     |
| GATA3         | NM_002051     |
| GCLM          | NM_002061     |
| GINS2         | NM_016095     |
| GMPS          | NM_003875     |
| GNAZ          | NM_002073     |
| GNG12         | NM_018841     |
| GPR126        | NM_152339     |
| GPR180        | AK024059      |
| GRB7          | NM_005310     |
| GRHL2         | NM_024915     |
| GSTM1         | NM_000561     |
| GSTM3         | NM_000849     |
| H2AFZ         | NM_002106     |
| H30384        | CONTIG47405RC |
| HN1           | NM_016185     |
| HOOK1         | AK027250      |
| HPN           | NM_002151     |
| HRASLS        | NM_020386     |
| HSPA5         | NM_005347     |
| IGFBP5        | NM_000599     |
| IL8           | NM_000584     |

|          |              |
|----------|--------------|
| PKMYT1   | NM_004203    |
| PPIE     | NM_006112    |
| PQLC2    | NM_017765    |
| PRC1     | NM_003981    |
| PRR11    | NM_018304    |
| PSMD7    | NM_002811    |
| PTTG1    | NM_004219    |
| QSOX2    | NM_181701    |
| RAB6B    | NM_016577    |
| RACGAP1  | NM_013277    |
| RARRES1  | NM_002888    |
| RASSF7   | NM_003475    |
| RECQL5   | NM_001003715 |
| RFC4     | NM_002916    |
| RHBDF2   | NM_024599    |
| RPL27    | NM_000988    |
| RRM2     | NM_001034    |
| RTN4RL1  | XM_091486    |
| RUNDC1   | NM_173079    |
| S100A9   | NM_002965    |
| SCD      | NM_005063    |
| SCUBE2   | NM_020974    |
| SERF1A   | NM_021967    |
| SERPINB5 | NM_002639    |
| SESN3    | NM_144665    |
| SF3B3    | NM_012426    |
| SLC16A3  | NM_004207    |
| SLC2A1   | NM_006516    |
| SLC2A3   | NM_006931    |
| SLC39A6  | NM_012319    |
| SNRPA1   | NM_003090    |
| SPAG5    | NM_006461    |
| SPOCD1   | NM_144569    |
| SPP1     | NM_000582    |
| SRD5SA2  | NM_024592    |
| STK32B   | NM_018401    |
| SUV39H2  | NM_024670    |
| SYNGR2   | NM_004710    |
| TFF1     | NM_003225    |
| TFF3     | NM_003226    |
| TGFB3    | NM_003239    |
| TK1      | NM_003258    |
| TLCD1    | NM_138463    |
| TMC6     | NM_007267    |
| TMEM158  | NM_015444    |
| TMEM176A | NM_018487    |
| TPI1     | NM_000365    |
| TSPYL5   | NM_033512    |
| TUBB4    | NM_006086    |
| UBE2C    | NM_007019    |
| UBE2S    | NM_014501    |
| UCHL5    | NM_015984    |
| VEGFA    | NM_003376    |

|          |           |
|----------|-----------|
| INPP4B   | NM_003866 |
| ITGA5    | NM_002205 |
| KIAA0125 | NM_014792 |
| KIF23    | NM_004856 |
| KIF2C    | NM_006845 |

|         |              |
|---------|--------------|
| WISP1   | NM_003882    |
| YWHAZ   | NM_003406    |
| ZNF367  | NM_153695    |
| ZNF385B | NM_001113397 |
